# 1 Trajectory changes are susceptible to 2 change blindness manipulations 3

4 Authors: Matt Jaquiere<sup>1\*</sup>, Nora Andermane<sup>2</sup>, Ron Chrisley<sup>3</sup>

5 Affiliation: <sup>1</sup> Department of Experimental Psychology, University of Oxford, Oxford, UK.

6 <sup>2</sup> Department of Psychology, University of Sussex, Falmer, Brighton, UK

7 <sup>3</sup> Department of Informatics, Centre for Cognitive Science (COGS), Sackler Centre for  
8 Consciousness Science, University of Sussex, Falmer, Brighton, UK

9 \* Corresponding author

10 Email: [matt.jaquiere@psy.ox.ac.uk](mailto:matt.jaquiere@psy.ox.ac.uk)

11 Abstract

12 People routinely fail to notice that things have changed in a visual scene if they do not perceive  
13 the changes in the process of occurring, a phenomenon known as ‘change blindness’ (1,2).  
14 The majority of lab-based change blindness studies use static stimuli and require participants  
15 to identify simple changes such as alterations in stimulus orientation or scene composition.

16 This study uses a ‘flicker’ paradigm adapted for dynamic stimuli which allowed for both simple  
17 orientation changes and more complex trajectory changes. Participants were required to  
18 identify a moving rectangle which underwent one of these changes against a background of  
19 moving rectangles which did not. The results demonstrated that participants’ ability to correctly  
20 identify the target deteriorated with the presence of a visual mask and a larger number of  
21 distractor objects, consistent with findings in previous change blindness work.

22 The study provides evidence that the flicker paradigm can be used to induce change blindness  
23 with dynamic stimuli, and that changes to predictable trajectories are detected or missed in  
24 the similar way as orientation changes.

## 25 Introduction

26 People routinely fail to notice that objects have changed in a visual scene if they do not  
27 perceive the changes in the process of occurring, a phenomenon known as ‘change blindness’  
28 (1,2). The majority of lab-based change blindness studies use static stimuli and require  
29 participants to identify simple changes such as alterations in stimulus orientation or scene  
30 composition (3–5), though others use more complex and realistic environments, especially  
31 driving simulators (6–8). This study examines whether changes to dynamic properties are  
32 detected or missed in the same way as changes to static properties.

33 Changes to static properties (e.g. the presence of a stimulus, or its orientation) are most  
34 readily detected when the transients (moment-to-moment variations) accompanying a change  
35 prompt an explicit comparison between a stored representation of a stimulus and its current  
36 presentation (9–11). Change blindness frequently occurs when this process is disrupted. If the  
37 representation of a stimulus includes information on dynamic properties (e.g. the trajectory  
38 along which a stimulus is travelling), change blindness would be expected to occur for changes  
39 to dynamic as well as static stimulus properties. Common methodologies for inducing change  
40 blindness prevent transient registration, typically by masking (12) or eliminating transients  
41 (1,13,14). In addition to masking transients, exhaustion of working memory capacity is  
42 required to produce change blindness effects reliably (15), with the contents of working  
43 memory exhibiting resistance to change blindness (2,16), a phenomenon which is stable  
44 enough to allow change blindness task performance to act as a guide to working memory  
45 contents in attentional bias studies (17–19).

46 Change blindness as deployed in the study of other phenomena (e.g. attentional biases) is  
47 reasonably well understood, but a gap exists between these structured laboratory experiments  
48 and the more sophisticated simulator-based and natural-world experiments (1,20,21). The use  
49 of dynamic paradigms such as video footage (22,23) or programmed displays (24) is required

50 for a detailed examination of the processes underpinning change blindness within busy,  
51 continually changing visual fields like those typical of everyday life (25).

52 Two key areas of enquiry are addressable with the use of dynamic stimuli: the nature of  
53 competition between transients in exogenous orienting ('grabbing') of attention; and the  
54 existence of an ability to make discriminations between patterns of transients. The first of these  
55 areas is to some extent already established by the existence of change blindness paradigms  
56 in which attention is directed away from transients by the application of 'mudsplashes' or  
57 similar distractors (12): the more prominent transients accompanying the mudsplashes  
58 outcompete those accompanying the change in the target stimulus leading to observable  
59 change blindness. The second area of enquiry, discrimination between patterns of transients,  
60 is only available in dynamic scenes where changes are already occurring, and requires the  
61 detection not of specific transients but of a change in the pattern of those transients. A change  
62 in a pattern of transients signifies a change in the way in which a change is occurring (e.g. an  
63 acceleration or a change in the direction of movement).

64 Change blindness to changes in trajectory has been demonstrated in macaque monkeys in a  
65 study which used a change in the flow direction of dots within a field, with distractor fields in  
66 which the flow direction remained constant also visible (26). The present experiment  
67 establishes a related finding in humans, namely that trajectory changes can drive attentional  
68 mechanisms in the same manner as orientation changes, demonstrating detection of and  
69 blindness to changes in an object's dynamic properties where the alterations to the patterns  
70 of transients are detected or undetected, respectively.

## 71 **Materials & Methods**

### 72 **Study structure**

73 The results presented below comprise an online study and a lab-based replication. Both  
74 studies used the same materials and methods; however, the experimental environment and  
75 presentation was standardized for the lab cohort.

### 76 **Participants**

77 Participants ( $N$  online = 42,  $N$  lab = 16) were recruited to the study. Online participants were  
78 recruited via university mailing lists and social networking websites, while lab participants were  
79 recruited via the mailing lists and word-of-mouth. Prior to beginning the task participants were  
80 informed that no personally identifying information would be recorded, that participation was  
81 voluntary and could be halted at any time, and that they would be identified by means of  
82 temporary browser cookies. The experiment was administered online and demographic data  
83 such as age, education, and gender identity were not collected. It is likely the majority of the  
84 online cohort were undergraduates. The lab cohort were undergraduate and postgraduate  
85 students at the University of Sussex.

86 Target sample size for the online cohort was determined by precedent. Similar change  
87 blindness paradigms administered under laboratory conditions have used sample sizes in the  
88 10-20 range (1,2,5,12,17,18,27). Given the reduction in precision accompanying the novel  
89 online administration in the present study, the previous range was doubled, resulting in a target  
90 sample size of 20-40. Active recruitment lasted two weeks, although participants were free to  
91 enter the study until the pre-established one-month data collection window had closed. Power  
92 analysis was used to determine the number of participants required for the lab-based study to  
93 produce 95% power for detecting the key interaction between masking and load as  
94 demonstrated in the online data.

## 95 **Ethics**

96 This research was conducted in accordance with the ethics procedures of the University of  
97 Sussex School of Life Sciences, and approved by the University of Sussex Life Sciences  
98 School Research Ethics Officer on behalf of the Cluster-based Research Ethics Committee  
99 Ethical Review Application ID (ER/MJ261/1). After being briefed about the content and nature  
100 of the task the participants were required to signal consent by following a hyperlink to the task  
101 page. Participants were informed that participation was voluntary and that they were free to  
102 stop at any time. Participation was unpaid, but the lab cohort were entitled to receive a small  
103 amount of course credit.

## 104 **Task**

105 The participants completed the task by visiting a webpage which used JavaScript to deliver a  
106 dynamic version of a 'flicker' paradigm (2). In a typical flicker paradigm, as in most change  
107 blindness paradigms, the task is to detect changes between two stimuli. In the flicker paradigm  
108 the participant is shown one stimulus, then the other, repeatedly. Importantly, the stimuli  
109 presentations are separated by a brief presentation of a blank screen (the 'mask'). If the stimuli  
110 are switched without a mask the parts of the scene that are different produce visual transients,  
111 attracting attention to the location of the change. If, however, the switch is accompanied by  
112 the mask, the offset of the first stimulus and the onset of the second both produce transients  
113 throughout the visual scene, resulting in no net increase in attention to the location of the  
114 change.

115 The task page presented participants with a 700x700 pixel working area. The initial stimulus  
116 consisted of a number of 50x25 pixel rectangles with randomly selected colours moved at 150  
117 pixels/second along a straight-line trajectory (Fig 1a). On low load trials there were 2  
118 rectangles; on high load trials there were 6. The direction of movement for each rectangle was  
119 determined randomly, subject to the constraints that: a) the rectangle could travel along the  
120 selected trajectory for the duration of the trial without leaving the working area; and b) there

121 existed at least one possible altered trajectory which would not leave the working area. The  
122 direction of movement bore no relation to the orientation of the rectangle. The alternate  
123 stimulus matched the initial stimulus except that one of the rectangles had either its orientation  
124 or its trajectory altered by  $\pm 90^\circ$  (the 'change type' manipulation). Each stimulus was displayed  
125 for 700ms (a discussion of the precision of this timing is included below: **Error! Reference**  
126 **source not found.**). The alternate stimulus was either presented immediately after the initial  
127 stimulus' 700ms display duration ('unmasked' condition) or after a 200ms mask ('masked'  
128 condition). During the mask the rectangles were rendered invisible, resulting in a plain white  
129 background. Crucially, all rectangles vanished and reappeared at the same time. Once the  
130 alternate stimulus had been displayed for 700ms the trial was restarted (Fig 1b), either  
131 immediately (unmasked condition) or following a second 200ms mask. Trials continued until  
132 the participant provided a response. A demonstration video showing 10 trials can be found at  
133 ([doi:10.6084/m9.figshare.5044894](https://doi.org/10.6084/m9.figshare.5044894)).

134 **Fig 1. The task display and presentation procedure.** a) Screenshot of the 700x700 pixel  
135 working area of the screen showing rectangles of random colours (selected from an approved  
136 region of colour-space) which moved in straight lines through the working area. After 700ms  
137 one of the rectangles would alter either its orientation or its trajectory by  $90^\circ$  either clockwise  
138 or anticlockwise. The task was to identify which of the rectangles had undergone this change.  
139 In the low load condition only two rectangles were presented; the high load condition  
140 presented six rectangles as shown. b) Flicker paradigm procedure. The initial scene (A) was  
141 displayed for 700ms, then a mask was put up for 200ms (masked condition) or 0ms  
142 (unmasked condition) before the initial scene was replaced with the altered scene (A'). The  
143 altered scene was displayed for 700ms and then masked and reverted to the initial scene. The  
144 process was repeated until the participant generated a response.

145

146 Research on multiple object tracking (28) has shown that, although object tracking does not  
147 interact with memory processes (29) (though see (30) for a dissenting view), tracked objects

148 are to some extent resistant to change blindness (31,32); tracking target selection is typically  
149 exogenous and based on colour and spatial location (33). As both of these were randomised  
150 in all trials, there was no systematic relationship between the likelihood of an object being  
151 tracked and its being the target object for that trial. Therefore, the dynamic paradigm did not  
152 undermine the validity of the change blindness.

153 Participants were asked to press the spacebar as soon as they had identified the altered  
154 rectangle. Pressing spacebar halted the movement of the rectangles and correct identification  
155 was checked by requiring the participants to click the rectangle which had changed.  
156 Participants were given the opportunity to practice the task until they were satisfied with their  
157 performance, and were provided with feedback as to their accuracy during the practice.

158 Each trial had one of eight possible types, defined by its specific arrangement of three different  
159 binary variables: whether a mask was present or not; whether scene load was low (2  
160 rectangles) or high (6 rectangles); and whether the target rectangle was changed in orientation  
161 or trajectory. Experimental condition was selected randomly at the beginning of each trial. The  
162 probability of low scene load was 30%, chosen because more errors were expected under  
163 high load. Mask presence (present or absent) and change type (orientation or trajectory  
164 change) were equally likely for both options (50%). The outcome measure was time elapsed  
165 between the beginning of the first presentation of the altered state and the moment the  
166 spacebar was depressed.

167 After every 10 trials participants were provided with statistics showing their accuracy and  
168 average speed over the last 10 trials, as well as their averages for all trials thus far completed.  
169 This provided a sense of progress for participants, and encouraged them to focus on fast and  
170 accurate responses. At the end of all 50 trials participants were shown their average accuracy  
171 and speed, as well as the average accuracy and speed for all participants combined.

172 Participants were invited to complete as many trials as they wished, though the provision of  
173 full feedback after 50 trials was intended to incentivise the completion of at least 50 trials per

174 participant. The overall number of trials, and the number of each type of trial seen by each  
175 participant was subject to some variation since some participants completed more trials than  
176 others and trial type was selected randomly at the beginning of each trial.

177 The lab participants completed 100 trials, and were given the information about their  
178 performance relative to others only after they have completed these 100 trials.

179 The task application was coded in HTML and JavaScript with the aid of the CraftyJS  
180 JavaScript game engine library version 0.7.0 (34). Results were sent using AJAX  
181 (Asynchronous JavaScript And XML) to a PHP script which stored them in a MySQL database  
182 and returned statistics to the participant when required. The JavaScript application was  
183 checked for compatibility with and parity between recent versions of the most common  
184 browsers (Microsoft Internet Explorer, Mozilla Firefox, Apple's Safari, and Google Chrome).  
185 Statistical analysis of data was performed using R (35) and its tidyverse package (36). Initial  
186 analyses, reported in supplementary material, were performed using IBM SPSS Statistics  
187 package (version 22.0.0).

## 188 **Variation within the online cohort**

189 The use of web-based psychological experiments is an increasingly popular approach to  
190 acquiring data which offers a number of trade-offs compared to laboratory experiments (37–  
191 39). Those advantages which are most salient to this project are the savings in time, money,  
192 and equipment, as well as the added convenience for participants who would have otherwise  
193 had to attend a laboratory session. Relevant disadvantages are primarily the result of non-  
194 standardised equipment (including screen brightness, size, and resolution) and environments  
195 (including noise levels and distractions) resulting in a slightly different experience of the  
196 experiment for each participant.

197 The paradigm was implemented with JavaScript. JavaScript's control (used for stimulus  
198 timings) is less precise than other frequently-used languages (40). There was thus  
199 unsystematic variation in stimulus and mask durations of  $\pm 10$ ms, as well as some variation in



200 the magnitude of this variation between browsers (on the order of  $\pm 5$ ms). The unsystematic  
201 variation constitutes noise, a factor addressed in the sample size (Participants). Variation on  
202 the basis of browser is handled statistically as a component of inter-participant variation  
203 (**Error! Reference source not found.**).

204 The retinal speed of stimuli was subject to variation between participants on the basis of  
205 screen size and viewing distance (which were not controlled). This variation is handled  
206 statistically as inter-participant variation (**Error! Reference source not found.**). A more  
207 pressing concern is the possibility that the experimental conditions may have been  
208 differentially affected by differences in stimulus retinal speed given that one of the conditions  
209 (trajectory change) was implemented through a change in the motion of the stimulus. This  
210 concern would be apt for manipulations in which the speed of the stimulus was altered (e.g.  
211 examining change detection for acceleration), but does not apply when, as here, the speed is  
212 kept constant while the direction of motion is altered.

213 The trade-off between these various factors was considered acceptable given the robustness  
214 of change blindness as a phenomenon: change blindness is inducible in a wide variety of  
215 situations from strict laboratory (31) to naturalistic (1) and virtual (41) settings. As expected  
216 given this robustness, pilot testing indicated that the experimental manipulations were  
217 successful in a range of hardware and software environments and usage scenarios.  
218 Furthermore, the online study was followed up by a lab-based replication using the same  
219 software in controlled conditions.

220 For the lab cohort, the above sources of variation were eliminated or reduced substantially  
221 (with the exception of the unsystematic variation in stimulus and mask durations caused by  
222 JavaScript's imprecise timing control). In the lab-based part of the study the task was  
223 presented on a 37.1 cm x 33.3 cm inch Dell monitor with a resolution of 1280 x 1024, a refresh  
224 rate of 60Hz, and colour depth of 32 Bit. The participants completed the task seated at a  
225 comfortable distance from the monitor of approximately 57 centimetres.

## 226 Paradigm selection

227 The flicker paradigm was selected because of its ease of implementation and its greater  
228 resilience to variations in screen size. This resilience is due to the particular method of  
229 transient suppression deployed in the flicker paradigm: in a flicker paradigm there are no  
230 change-specific transients since the transition (in the masked condition) is from initial stimulus,  
231 to mask, to alternate stimulus. Other methods, such as the mudsplash paradigm (12), rely  
232 upon attracting attention away from change-specific transients by introducing more salient  
233 transients elsewhere. While these other methods are likely to work given the robustness of  
234 change blindness as a phenomenon, screen size variation among online participants means  
235 that the distance between any two points on the screen could not be guaranteed to produce  
236 equal visual space distances for all participants. Thus, relying upon location-based transient-  
237 suppression would introduce unnecessary variation between participants.

## 238 Results

### 239 Descriptives and exclusions

240 Experimental data consisted of 3035 trials (online = 1545, lab = 1490) from 42 participants  
241 (online = 27, lab = 15). Trials were excluded if the wrong object was identified as having  
242 changed, if the trial took longer than 20s, or if the trial belonged to a participant who either had  
243 zero valid trials for any of the eight trial types or had an overall accuracy below 90% (Table 1).

244 Table 1. Trial exclusion process

| Criterion<br>(sequentially applied) | Trial count |      |       | Running total |
|-------------------------------------|-------------|------|-------|---------------|
|                                     | Online      | Lab  | Total |               |
| All trials                          | 2226        | 1746 | 3972  | <b>3972</b>   |
| Errors                              | 120         | 109  | 229   | <b>3743</b>   |
| RT > 20s                            | 139         | 81   | 220   | <b>3523</b>   |

|                     |     |    |     |             |
|---------------------|-----|----|-----|-------------|
| Missing trial types | 190 | 0  | 190 | <b>3333</b> |
| Accuracy < 90%      | 232 | 66 | 298 | <b>3035</b> |

245

246 The excluded trials were examined for differences in manipulation using  $\chi^2$  tests with Yates'  
247 continuity correction, conducted on those trials performed by the 42 participants included in  
248 the experimental data. Errors occurred significantly more often than expected by chance in  
249 masked than unmasked trials ( $\chi^2(1, N = 3354) = 30.0, p < .001$ ), in high than low load trials  
250 ( $\chi^2(1, N = 3354) = 29.5, p < .001$ ), and in orientation than trajectory trials ( $\chi^2(1, N = 3354) =$   
251  $5.67, p = .017$ ).

252 Online participants completed an average of 57.2 ( $\pm$ SD 4.49) trials, and lab participants 99.3  
253 ( $\pm$ SD 5.83). There was no significant difference in the number of orientation and trajectory  
254 trials included in the final statistical analysis for either the online ( $t(214.0) = -0.227, M_{diff} = -$   
255  $0.139$  [95%CI: -1.35, 1.07],  $p = .821$ ) or lab cohort ( $t(118.0) = -0.624, M_{diff} = -0.667$  [95%CI: -  
256  $2.78, 1.45$ ],  $p = .534$ ). The distribution of trials by contingency for each cohort is shown in  
257 **Error! Reference source not found..** These data, including excluded trials and participants,  
258 have been made available along with the script used to analyse them ([https://doi.org/](https://doi.org/10.6084/m9.figshare.6580223)  
259 [10.6084/m9.figshare.6580223](https://doi.org/10.6084/m9.figshare.6580223)).

260 **Fig 2. Trial type distribution.** The trial type was selected at random at the beginning of each  
261 trial. Boxplots show the distribution of the number of trials of each trial type completed  
262 (successfully) by participants in the online and lab cohorts.

263

264 Analyses were performed with trials collapsed by participant. The means number of trials and  
265 response time for each condition, and their 95% confidence intervals, are shown in Table 2.  
266 Response times are calculated from the moment responding is enabled (after the altered  
267 stimulus becomes visible) until a response is recorded. For masked trials, in which repetitions  
268 of the mask make responding more difficult, response times are reduced by the duration of

269 the masks displayed. Analysis using unadjusted response times made no difference to the  
 270 pattern of results obtained.

271 Table 2. Means

| Trial Type                     | Number of Trials |       | Response Time (ms) |        |                |
|--------------------------------|------------------|-------|--------------------|--------|----------------|
|                                | mean             | 95%CI | mean               | 95%CI  |                |
| High load Unmasked Orientation | Online           | 11.2  | 9.4, 12.9          | 1738.0 | 1105.9, 2370.1 |
|                                | Lab              | 18.5  | 16.4, 20.6         | 1574.4 | 1195.4, 1953.4 |
| Low load Masked Trajectory     | Online           | 4.3   | 3.5, 5.2           | 889.0  | 577.9, 1200.1  |
|                                | Lab              | 7.5   | 6.4, 8.5           | 762.9  | 637.1, 888.8   |
| Low load Unmasked Orientation  | Online           | 4.6   | 3.6, 5.6           | 813.3  | 638.4, 988.1   |
|                                | Lab              | 9.5   | 8.0, 10.9          | 722.4  | 604.8, 840.1   |
| High load Masked Orientation   | Online           | 8.1   | 6.3, 9.9           | 3786.4 | 3012.1, 4560.6 |
|                                | Lab              | 14.4  | 12.1, 16.7         | 4224.1 | 3597.0, 4851.3 |
| High load Unmasked Trajectory  | Online           | 11.0  | 9.2, 12.8          | 1282.7 | 942.7, 1622.7  |
|                                | Lab              | 18.6  | 16.7, 20.5         | 754.0  | 651.9, 856.0   |
| Low load Masked Orientation    | Online           | 4.5   | 3.5, 5.4           | 1207.4 | 735.9, 1678.9  |
|                                | Lab              | 5.9   | 4.8, 7.0           | 1034.7 | 814.4, 1255.0  |
| Low load Unmasked Trajectory   | Online           | 4.6   | 3.6, 5.6           | 655.3  | 498.7, 811.9   |
|                                | Lab              | 8.5   | 6.6, 10.5          | 486.7  | 449.6, 523.8   |
| High load Masked Trajectory    | Online           | 9.0   | 7.3, 10.6          | 3699.7 | 3002.1, 4397.3 |
|                                | Lab              | 16.4  | 14.0, 18.8         | 3565.5 | 3077.4, 4053.6 |

272

## 273 Open science

274 Analysis of data from the lab cohort was preregistered (<https://aspredicted.org/rh3d2.pdf>) to  
 275 use a 2x2x2 within-subjects ANOVA, and to be repeated covering both raw and adjusted  
 276 response time as a dependant variable. These analyses were conducted, but, given the

277 similarity to the main analysis reported below, are not reported in detail here. Detailed results  
278 from all analyses conducted in this paper, the raw data upon which they are based, and the  
279 scripts used to produce them, are available online  
280 <https://doi.org/10.6084/m9.figshare.6580223>.

## 281 Main analysis

282 The data were analysed with a mixed (2x2x2x2) ANOVA. Change type (orientation vs  
283 trajectory), masking (unmasked vs masked), and load (low vs high) were the within-subjects  
284 variables, and cohort (online vs lab) was the between-subjects variable. Main effects were  
285 observed for all three within-subjects factors: responses were slower when masked ( $F(1,40)$   
286  $= 218.0$ ,  $p < .001$ ,  $\eta_p^2 = .846$ ,  $M_{diff} = -1358.7$  [95%CI: -1677.7, -1039.7]); under high load  
287 ( $F(1,40) = 252.5$ ,  $p < .001$ ,  $\eta_p^2 = .863$ ,  $M_{diff} = -1750.6$  [95%CI: -2046.7, -1454.4]); and for  
288 orientation changes ( $F(1,40) = 14.3$ ,  $p < .001$ ,  $\eta_p^2 = .285$ ,  $M_{diff} = 341.0$  [95%CI: -689.6, 7.5]).  
289 A significant interaction was observed for masking x load, with the increase in response time  
290 for masked trials being exacerbated under high load ( $F(1,40) = 179.1$ ,  $p < .001$ ,  $\eta_p^2 = .820$ ),  
291 while other interactions were not significant (all  $F(1,40) < 1.66$ , all  $p > .206$ ,  $\eta_p^2 < .085$ ). There  
292 was no effect of the between subjects factor, either as a main effect ( $F(1,40) = 0.232$ ,  $p = .633$ ,  
293  $\eta_p^2 = .006$ ,  $M_{diff} = 118.4$  [95%CI: -231.6, 468.3]), or in interactions (all  $F(1,40) < 2.50$ , all  $p >$   
294  $.122$ , all  $\eta_p^2 < .059$ ).

295 The presence of an interaction between masking and load (Fig 3) indicates that change  
296 blindness occurred. The absence of three-way interaction between that interaction and  
297 change type is consistent with the suggestion that the change blindness effect is equivalent  
298 between change types. These data are consistent with the hypothesis that trajectory changes  
299 are detected and missed in a similar manner to orientation changes.

300 **Fig 3. Change blindness interaction.** The key pattern of interaction, whereby the response  
301 time for high load masked trials is far greater than either masked or high load trials alone, is

302 evident for both orientation and trajectory changes. This relationship is stable between the  
303 online and lab cohorts. Error bars show 95% confidence intervals.

304

305 This analysis was checked for robustness under various different assumptions: using non-  
306 adjusted response times; excluding trials with a response time under 200ms ( $N = 18$ ); including  
307 all trials with a non-erroneous response time; and analysing the cohorts separately. None of  
308 these alternate analyses resulted in a different core pattern of results (main effects of masking  
309 and load, and an interaction between them), though the main effect of change type was non-  
310 significant in some cases. For the lab cohort alone, a significant interaction arose between  
311 change type and load ( $\eta_p^2 = .414$ ).

312 Finally, a reviewer noted that the dramatic disruption arising from refreshing the display after  
313 the A' panel has finished (Fig 1b) constituted a larger disruption than the visual mask, and that  
314 results may be artificially elongated by this effect. Since this only occurs on trials where  
315 answers are not given within the first A' panel (i.e.  $RT \leq 700ms$ ), we also performed analysis  
316 in which response time was replaced as the dependant variable by a binary variable indicating  
317 whether or not a response was made within the first A' panel. The mean is thus the proportion  
318 of trial which were solved immediately, and is conceptually similar to measuring whether or  
319 not the participant detected the change in a one-shot paradigm.

320 The core result was robust to this analysis: unmasked changes were more likely to be noticed  
321 immediately than masked changes ( $F(1,40) = 200.8, p < .001, \eta_p^2 = .842, M_{diff} = .302$  [95%CI:  
322 .228, .377]); changes were more likely to be noticed immediately under low load ( $F(1,40) =$   
323  $195.5, p < .001, \eta_p^2 = .830, M_{diff} = .361$  [95%CI: .289, .432]); and these effects interacted with  
324 one another ( $F(1,40) = 28.1, p < .001, \eta_p^2 = .414$ ). Additionally, a main effect of change type  
325 was observed, with trajectory changes being noticed immediately more frequently than  
326 orientation changes ( $F(1,40) = 63.9, p < .001, \eta_p^2 = .670, M_{diff} = .134$  [95%CI: .054, .213]). This  
327 effect of change type also interacted with the masking x load interaction, resulting in a three-

328 way interaction ( $F(1,40) = 9.58, p = .004, \eta_p^2 = .229$ ). The main effects of masking and change  
329 type interacted with cohort, both being increased by lab conditions (masking:  $F(1,40) = 11.7,$   
330  $p = .001, \eta_p^2 = .226$ ; change type:  $F(1,40) = 17.3, p < .001, \eta_p^2 = .302$ ).

## 331 Discussion

332 The results demonstrate that change blindness was achieved using the implementation.  
333 Where scenes were sparsely populated enough for the relevant properties of all objects to be  
334 maintained in working memory, or where transients accompanying key changes were  
335 available, changes were noticed rapidly. Where working memory exhaustion and transient  
336 masking occurred simultaneously, changes were noticed far more slowly. This pattern of  
337 results is typical of change blindness in both direction and magnitude (2,13,27,42).

338 The use of dynamic stimuli did not compromise the orientation change blindness effects,  
339 consistent with suggestions of (26,43). The replication of change blindness to orientation  
340 changes validates the methodology used here, and the similar patterns of results in the  
341 orientation and trajectory conditions suggests that change blindness was also evoked for  
342 trajectory changes. The existence of change blindness to trajectory changes implies that  
343 trajectory changes are capable of directing attention exogenously since change blindness  
344 involves a loss of exogenous attention manipulation when its triggers are suppressed.

## 345 Investigation of trajectory change blindness

346 Transients are not required to detect all changes, as occasional success in masked change  
347 detection tasks proves (44), and thus there is a question as to whether there are classes of  
348 short-term changes which are routinely detected without recourse to transients. The present  
349 study examines whether trajectory changes are a class of discriminable changes which do not  
350 depend upon the detection of transients or differences in patterns of transients.

351 Were trajectory change detection typically transient-dependant it would be expected that  
352 trajectory change detection response time would be modified in a similar way to orientation

353 change detection response time under change blindness manipulations. This is demonstrated  
354 statistically by the absence of an interaction between the type of change variable and the load  
355 and masking variables. While certain choices in the statistical analysis did indicate differences  
356 in the magnitude of the change blindness interaction between orientation and trajectory  
357 changes, the larger effects were for the trajectory trials and the interaction remained strong  
358 for both change types. Since trajectory change detection responded in the same way as  
359 orientation change detection, and since orientation change detection is driven by the detection  
360 of transients whose presence the experiment directly manipulated, the conclusion is invited  
361 that trajectory change detection relies on the detection of visual transients (or patterns of  
362 transients) in the same way that orientation change detection does.

363 Orientation and direction-of-motion are neurophysiologically related under some conditions  
364 since the direction of slow movement is computed by direction-of-motion cells and rapid  
365 movement is computed by a combination of direction-of-motion and orientation-sensitive cells  
366 (45,46). Rapid motion was not a focus in the current design because the stimuli moved too  
367 slowly to produce motion streaks, but it is plausible that trajectory changes would be detected  
368 by the orientation of motion streaks in a rapid motion version of the current paradigm. In the  
369 study presented here it is likely that orientation and trajectory changes were detected by  
370 different neural populations: direction-of-motion cells for trajectory changes and orientation-  
371 sensitive cells for orientation changes.

372 The trajectory-orientation differences were stable across other manipulations, but were  
373 pronounced enough to produce a significant main effect of change type under some statistical  
374 choices. The difference may be explained by the consequences of the changes. Orientation  
375 changes happen 'all at once' in the sense that the orientation after the change is as different  
376 from the pre-change orientation as it will get. Trajectory changes are instantiated just as  
377 quickly when the direction of motion is altered, but the spatial position of the object differs  
378 increasingly from the extrapolated location along the original trajectory as time goes on. For  
379 changes which are not noticed immediately (due to transients orienting attention to the



380 change), comparisons between incoming sensory data and an estimate derived by  
381 extrapolating from memory become more extreme over time for trajectory changes. This could  
382 result in trajectory changes being detected more quickly on average because the change is,  
383 in some sense, continuing to occur.

384 It is important to note here that the saliency of the trajectories was controlled through the use  
385 of objects moving on a two-dimensional plane and through randomisation of both initial  
386 trajectories and direction of deflection. It would be expected that in an experiment where  
387 changes increased the saliency of trajectories (e.g. to move towards the participant), those  
388 changes would be detected rapidly even where the change was masked. This expectation  
389 would be in keeping with previous findings suggesting a link between saliency and change  
390 blindness attenuation across various different kinds of saliency measures (2,18,19).

## 391 **Conclusion**

392 This experiment replicates change blindness using a dynamic version of the flicker paradigm  
393 and shows that a pattern of results typical of change blindness can be obtained for trajectory  
394 changes.

395 The experiment demonstrates that detection of trajectory changes can be subject to change  
396 blindness. Change blindness is theorised to occur on the basis of the detection of transients,  
397 and thus this experiment can be taken to show that trajectory change detection depends on  
398 the detection of the fluctuations in the patterns of transients accompanying trajectory change.  
399 While there may be discriminations which can only be made using top-down mechanisms, the  
400 presence of transients driving a trajectory change suggests that bottom-up processes can  
401 account for, at the least, some discriminations regarding changes in higher-order object  
402 properties.

403 The differences between detection speed for orientation and trajectory changes suggest that  
404 trajectory changes are detected more readily and are slightly more resistant to masking by  
405 flicker. This may be due to the additional temporal information that expected trajectories afford.

406 Alternatively, trajectories of the separate elements may be represented in a gist-like pattern of  
407 movement which boosts the salience of a single trajectory deviation, whereas the orientation  
408 alterations may require serial search for identification of change. Future research examining  
409 eye movements during the detection of orientation and trajectory changes could further our  
410 understanding of this difference.

## 411 **Acknowledgements**

412 Thanks are due to Alex Martin for vital feedback during the development of the testing  
413 application, for assistance in locating participants, and for helpful comments on various drafts  
414 of this manuscript. This work would have remained unpublished but for the insightful  
415 comments and guidance from Paul Graham. Thanks also to Jenny Bosten for particularly  
416 helpful comments and critique. Finally, the authors are grateful for the valuable contribution of  
417 three reviewers, which resulted in a clearer and better manuscript.

## 418 **Author Contributions**

419 MJ designed the experiment, developed the application, analysed the data, and wrote the  
420 manuscript, all under the supervision of RC. NA conducted the lab-based replication and  
421 contributed to the drafting of the manuscript.

## 422 **References**

- 423 1. Simons DJ, Levin DT. Failure to detect changes to people during a real-world interaction.  
424 *Psychon Bull Rev.* 1998 Dec;5(4):644–9.
- 425 2. Rensink RA, O'Regan JK, Clark JJ. To See or not to See: The Need for Attention to  
426 Perceive Changes in Scenes. *Psychol Sci.* 1997 Sep 1;8(5):368–73.
- 427 3. Hughes HC, Caplovitz GP, Loucks RA, Fendrich R. Attentive and Pre-Attentive  
428 Processes in Change Detection and Identification. *PLOS ONE.* 2012 Aug  
429 16;7(8):e42851.
- 430 4. Lyyra P, Mäkelä H, Hietanen JK, Astikainen P. Implicit Binding of Facial Features During  
431 Change Blindness. *PLOS ONE.* 2014 Jan 30;9(1):e87682.

- 432 5. Gaspar JG, Neider MB, Simons DJ, McCarley JS, Kramer AF. Change Detection:  
433 Training and Transfer. *PLOS ONE*. 2013 Jun 28;8(6):e67781.
- 434 6. Borowsky A, Horrey WJ, Liang Y, Garabet A, Simmons L, Fisher DL. The effects of brief  
435 visual interruption tasks on drivers' ability to resume their visual search for a pre-cued  
436 hazard. *Accid Anal Prev*. 2016 Aug 1;93:207–16.
- 437 7. Charlton SG, Starkey NJ. Driving without awareness: The effects of practice and  
438 automaticity on attention and driving. *Transp Res Part F Traffic Psychol Behav*. 2011  
439 Nov 1;14(6):456–71.
- 440 8. Lee Y-C, Lee JD, Ng Boyle L. Visual Attention in Driving: The Effects of Cognitive Load  
441 and Visual Disruption. *Hum Factors J Hum Factors Ergon Soc*. 2007 Aug;49(4):721–33.
- 442 9. Simons DJ, Ambinder MS. Change Blindness Theory and Consequences. *Curr Dir  
443 Psychol Sci*. 2005 Feb 1;14(1):44–8.
- 444 10. Mitroff SR, Simons DJ, Levin DT. Nothing compares 2 views: Change blindness can  
445 occur despite preserved access to the changed information. *Percept Psychophys*. 2004  
446 Nov;66(8):1268–81.
- 447 11. Jensen MS, Yao R, Street WN, Simons DJ. Change blindness and inattentional  
448 blindness: Change blindness and inattentional blindness. *Wiley Interdiscip Rev Cogn Sci*.  
449 2011 Sep;2(5):529–46.
- 450 12. O'Regan JK, Rensink RA, Clark JJ. Change-blindness as a result of 'mudsplashes'.  
451 *Nature*. 1999 Mar 4;398(6722):34–34.
- 452 13. Levin DT, Simons DJ. Failure to detect changes to attended objects in motion pictures.  
453 *Psychon Bull Rev*. 1997 Dec;4(4):501–6.
- 454 14. O'Regan JK, Deubel H, Clark JJ, Rensink RA. Picture Changes During Blinks: Looking  
455 Without Seeing and Seeing Without Looking. *Vis Cogn*. 2000 Jan 1;7(1–3):191–211.
- 456 15. Baddeley A. Working memory: looking back and looking forward. *Nat Rev Neurosci*. 2003  
457 Oct;4(10):829–39.
- 458 16. Smith H, Milne E. Reduced change blindness suggests enhanced attention to detail in  
459 individuals with autism. *J Child Psychol Psychiatry*. 2009 Mar 1;50(3):300–6.
- 460 17. Chen W, Liu CH, Nakabayashi K. Beauty Hinders Attention Switch in Change Detection:  
461 The Role of Facial Attractiveness and Distinctiveness. *PLOS ONE*. 2012 Feb  
462 29;7(2):e32897.
- 463 18. Ro T, Russell C, Lavie N. Changing Faces: A Detection Advantage in the Flicker  
464 Paradigm. *Psychol Sci*. 2001 Jan 1;12(1):94–9.
- 465 19. Jones BT, Jones BC, Smith H, Copley N. A flicker paradigm for inducing change  
466 blindness reveals alcohol and cannabis information processing biases in social users.  
467 *Addiction*. 2003 Feb 1;98(2):235–44.
- 468 20. White CB, Caird JK. The blind date: The effects of change blindness, passenger  
469 conversation and gender on looked-but-failed-to-see (LBFTS) errors. *Accid Anal Prev*.  
470 2010 Nov 1;42(6):1822–30.

- 471 21. Harms IM, Brookhuis KA. Dynamic traffic management on a familiar road: Failing to  
472 detect changes in variable speed limits. *Transp Res Part F Traffic Psychol Behav.* 2016  
473 Apr 1;38:37–46.
- 474 22. Levin DT, Varakin DA. No pause for a brief disruption: Failures of visual awareness  
475 during ongoing events. *Conscious Cogn.* 2004 Jun 1;13(2):363–72.
- 476 23. Wallis G, Bulthoff H. What's Scene and Not Seen: Influences of Movement and Task  
477 Upon What We See. *Vis Cogn.* 2000 Jan 1;7(1–3):175–90.
- 478 24. Vachon F, Vallières B, Jones D, Tremblay S. Nonexplicit Change Detection in Complex  
479 Dynamic Settings: What Eye Movements Reveal. *Hum Factors.* 2012 Dec 1;54:996–  
480 1007.
- 481 25. Smith TJ, Lamont P, Henderson JM. Change Blindness in a Dynamic Scene Due to  
482 Endogenous Override of Exogenous Attentional Cues. *Perception.* 2013 Aug  
483 1;42(8):884–6.
- 484 26. Cavanaugh J, Wurtz R. Change blindness for motion in macaque monkey. *J Vis.* 2002  
485 Nov 15;2(7):16–16.
- 486 27. Hewlett P, Oezbek C. How Stimulus Variables Combine to Affect Change Blindness. *Curr*  
487 *Psychol.* 2012 Nov 8;31(4):337–48.
- 488 28. Pylyshyn ZW, Storm RW. Tracking multiple independent targets: Evidence for a parallel  
489 tracking mechanism\*. *Spat Vis.* 1988 Jan 1;3(3):179–97.
- 490 29. Pylyshyn Z. Some puzzling findings in multiple object tracking: I. Tracking without  
491 keeping track of object identities. *Vis Cogn.* 2004 Oct 1;11(7):801–22.
- 492 30. Makovski T, Jiang YV. Feature binding in attentive tracking of distinct objects. *Vis Cogn.*  
493 2009 Jan 1;17(1–2):180–94.
- 494 31. Bahrami B. Object property encoding and change blindness in multiple object tracking.  
495 *Vis Cogn.* 2003 Nov 1;10(8):949–63.
- 496 32. Scholl BJ, Pylyshyn ZW, Franconeri SL. When are featural and spatiotemporal properties  
497 encoded as a result of attentional allocation? In: *Investigative Ophthalmology & Visual*  
498 *Science. ASSOC RESEARCH VISION OPHTHALMOLOGY INC 9650 ROCKVILLE*  
499 *PIKE, BETHESDA, MD 20814-3998 USA; 1999. p. S797–S797.*
- 500 33. Pylyshyn ZW, Annan V. Dynamics of target selection in Multiple Object Tracking (MOT).  
501 *Spat Vis.* 2006 Nov 1;19(6):485–504.
- 502 34. Crafty - JavaScript Game Engine, HTML5 Game Engine [Internet]. 2016 [cited 2016 Jan  
503 1]. Available from: <http://craftyjs.com/>
- 504 35. R Core Team. R: A Language and Environment for Statistical Computing [Internet].  
505 Vienna, Austria: R Foundation for Statistical Computing; 2017. Available from:  
506 <https://www.R-project.org/>
- 507 36. Wickham H. tidyverse: Easily Install and Load the 'Tidyverse' [Internet]. 2017. Available  
508 from: <https://CRAN.R-project.org/package=tidyverse>

- 509 37. Hewson C, Vogel C, Laurent D. Internet research methods [Internet]. Sage; 2015 [cited  
510 2016 Jun 30]. Available from:  
511 [https://books.google.co.uk/books?hl=en&lr=&id=w8mICwAAQBAJ&oi=fnd&pg=PP1&ot](https://books.google.co.uk/books?hl=en&lr=&id=w8mICwAAQBAJ&oi=fnd&pg=PP1&ots=s_oG_WAYJg0p&sig=OhhYyGIkYMIgbZ4DcgnUWsfcnIo)  
512 [s=s\\_oG\\_WAYJg0p&sig=OhhYyGIkYMIgbZ4DcgnUWsfcnIo](https://books.google.co.uk/books?hl=en&lr=&id=w8mICwAAQBAJ&oi=fnd&pg=PP1&ots=s_oG_WAYJg0p&sig=OhhYyGIkYMIgbZ4DcgnUWsfcnIo)
- 513 38. Reips U-D. The methodology of Internet-based experiments. *Oxf Handb Internet*  
514 *Psychol.* 2007;373–390.
- 515 39. Meyerson P, Tryon WW. Validating Internet research: A test of the psychometric  
516 equivalence of Internet and in-person samples. *Behav Res Methods Instrum Comput.*  
517 2003;35(4):614–620.
- 518 40. HTML Standard [Internet]. WHATWG.org. 2017 [cited 2017 May 26]. Available from:  
519 <https://html.spec.whatwg.org/multipage/webappapis.html#timers>
- 520 41. Vasser M, Kängsepp M, Aru J. Change Blindness in 3D Virtual Reality. *ArXiv150805782*  
521 *Cs Q-Bio* [Internet]. 2015 Aug 24 [cited 2016 Mar 15]; Available from:  
522 <http://arxiv.org/abs/1508.05782>
- 523 42. Rensink RA. Visual Search for Change: A Probe into the Nature of Attentional  
524 Processing. *Vis Cogn.* 2000 Jan 1;7(1–3):345–76.
- 525 43. Rich A, Gillam B. Failure to detect changes in color for lines rotating in depth: the effects  
526 of grouping and type of color change. *Vision Res.* 2000 Jun;40(10–12):1377–84.
- 527 44. Simons DJ, Rensink RA. Change blindness: past, present, and future. *Trends Cogn Sci.*  
528 2005 Jan;9(1):16–20.
- 529 45. Apthorp D, Schwarzkopf DS, Kaul C, Bahrami B, Alais D, Rees G. Direct evidence for  
530 encoding of motion streaks in human visual cortex. *Proc R Soc B Biol Sci* [Internet]. 2013  
531 Feb 7 [cited 2015 Dec 20];280(1752). Available from:  
532 <http://www.ncbi.nlm.nih.gov/pmc/articles/PMC3574303/>
- 533 46. Geisler WS. Motion streaks provide a spatial code for motion direction. *Nature.* 1999 Jul  
534 1;400(6739):65–9.

**A**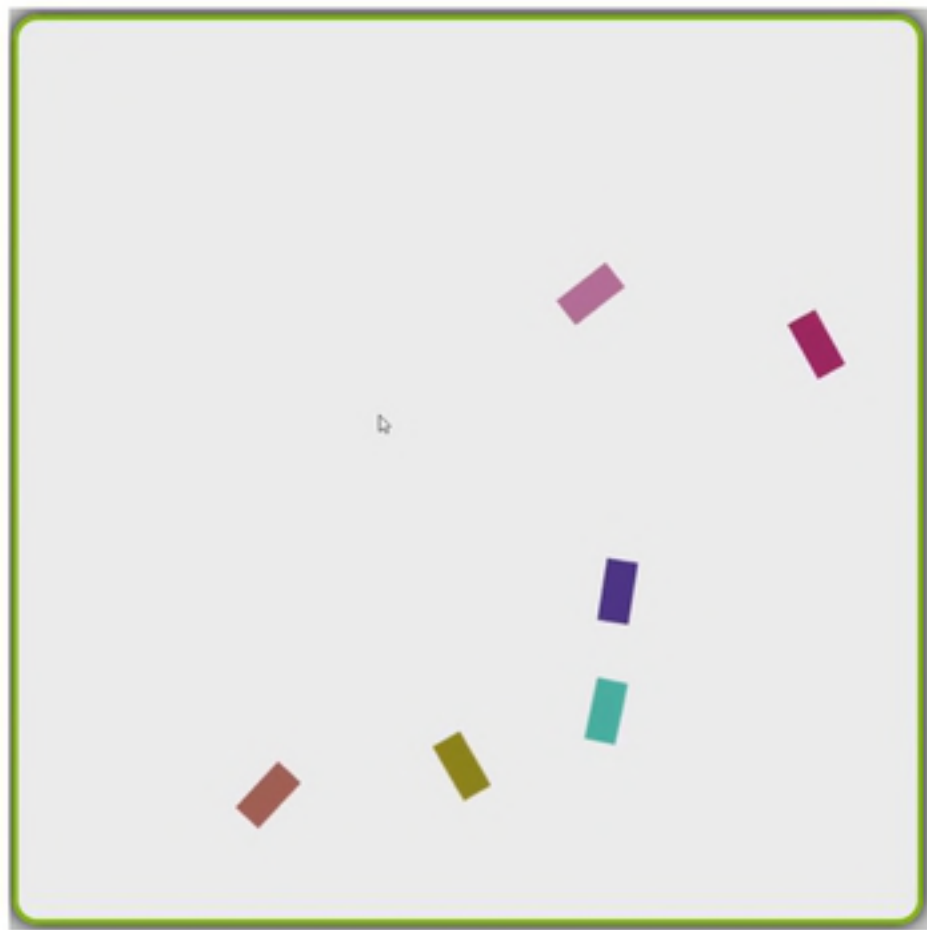**B**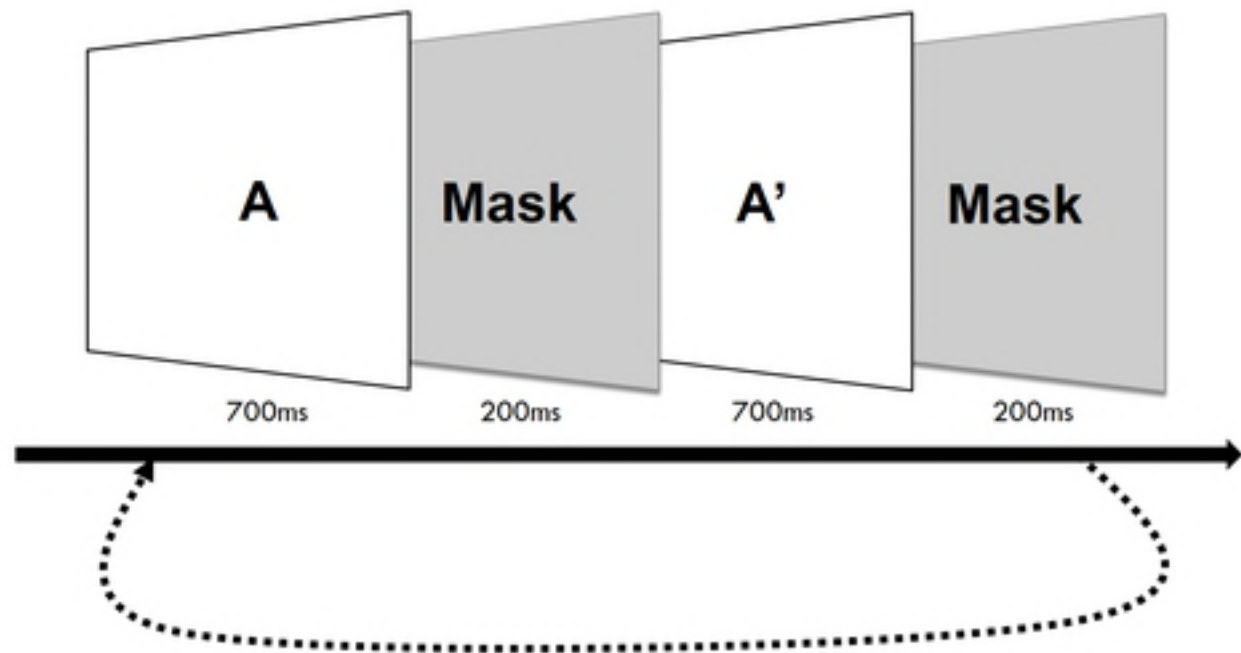

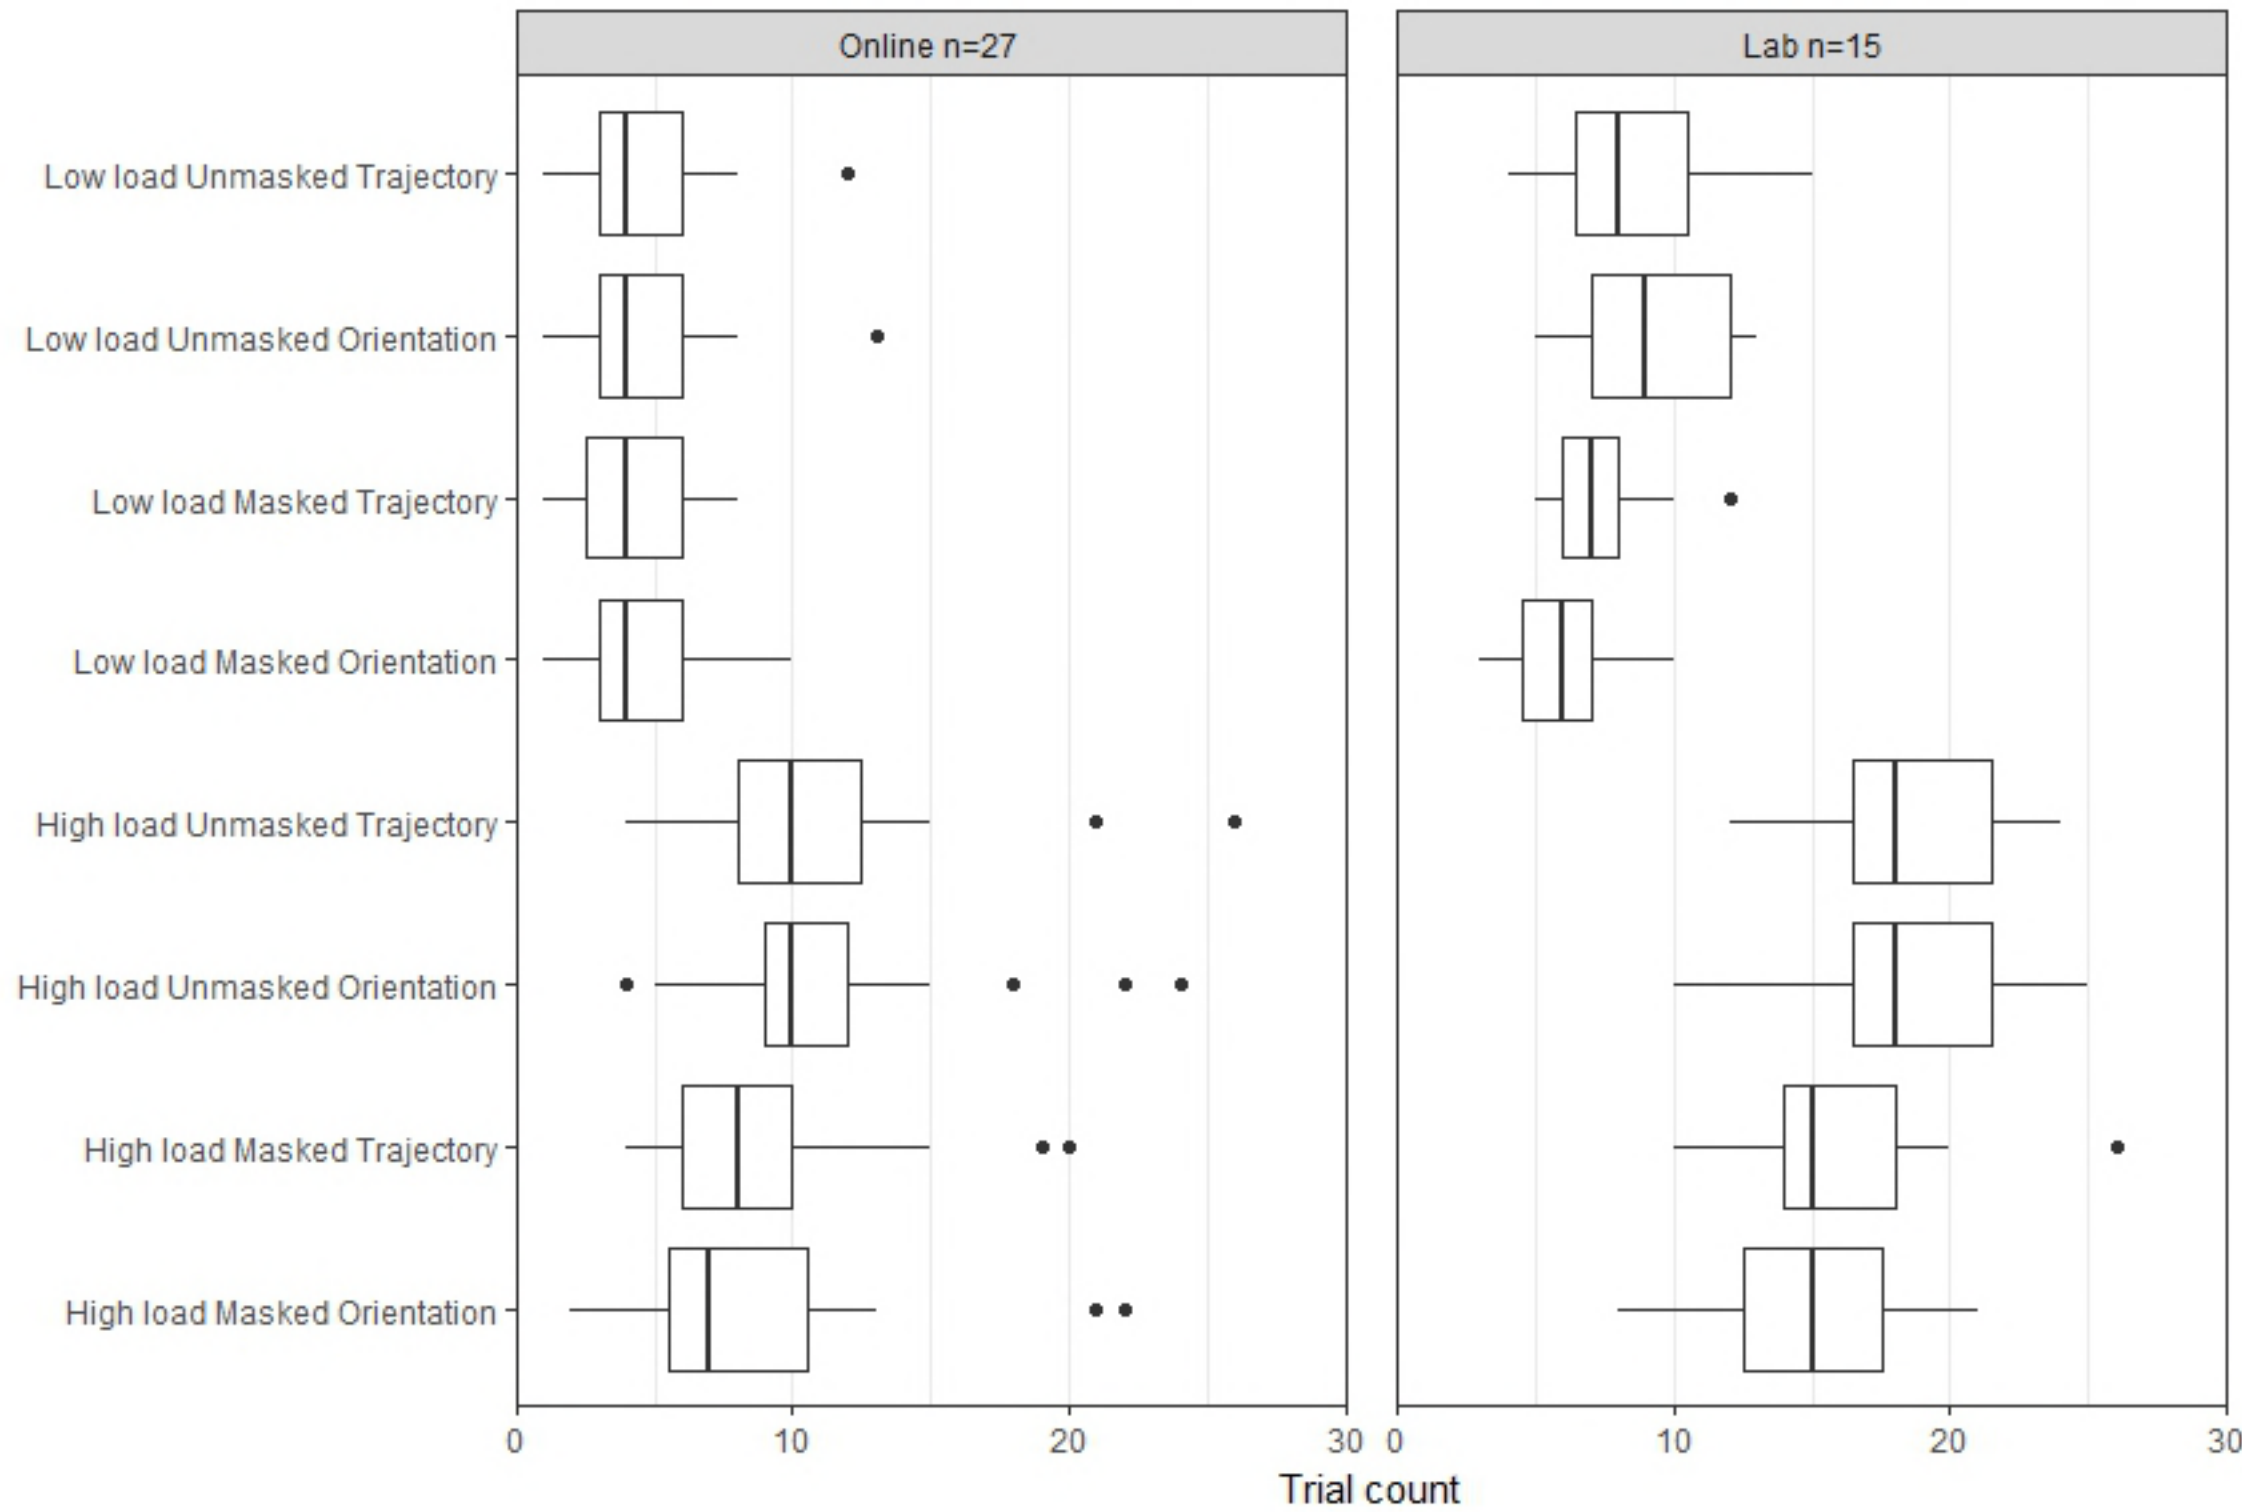

◆ Unmasked ◆ Masked

bioRxiv preprint doi: <https://doi.org/10.1101/391359>; this version posted August 13, 2018. The copyright holder for this preprint (which was not certified by peer review) is the author/funder, who has granted bioRxiv a license to display the preprint in perpetuity. It is made available under aCC-BY 4.0 International license.

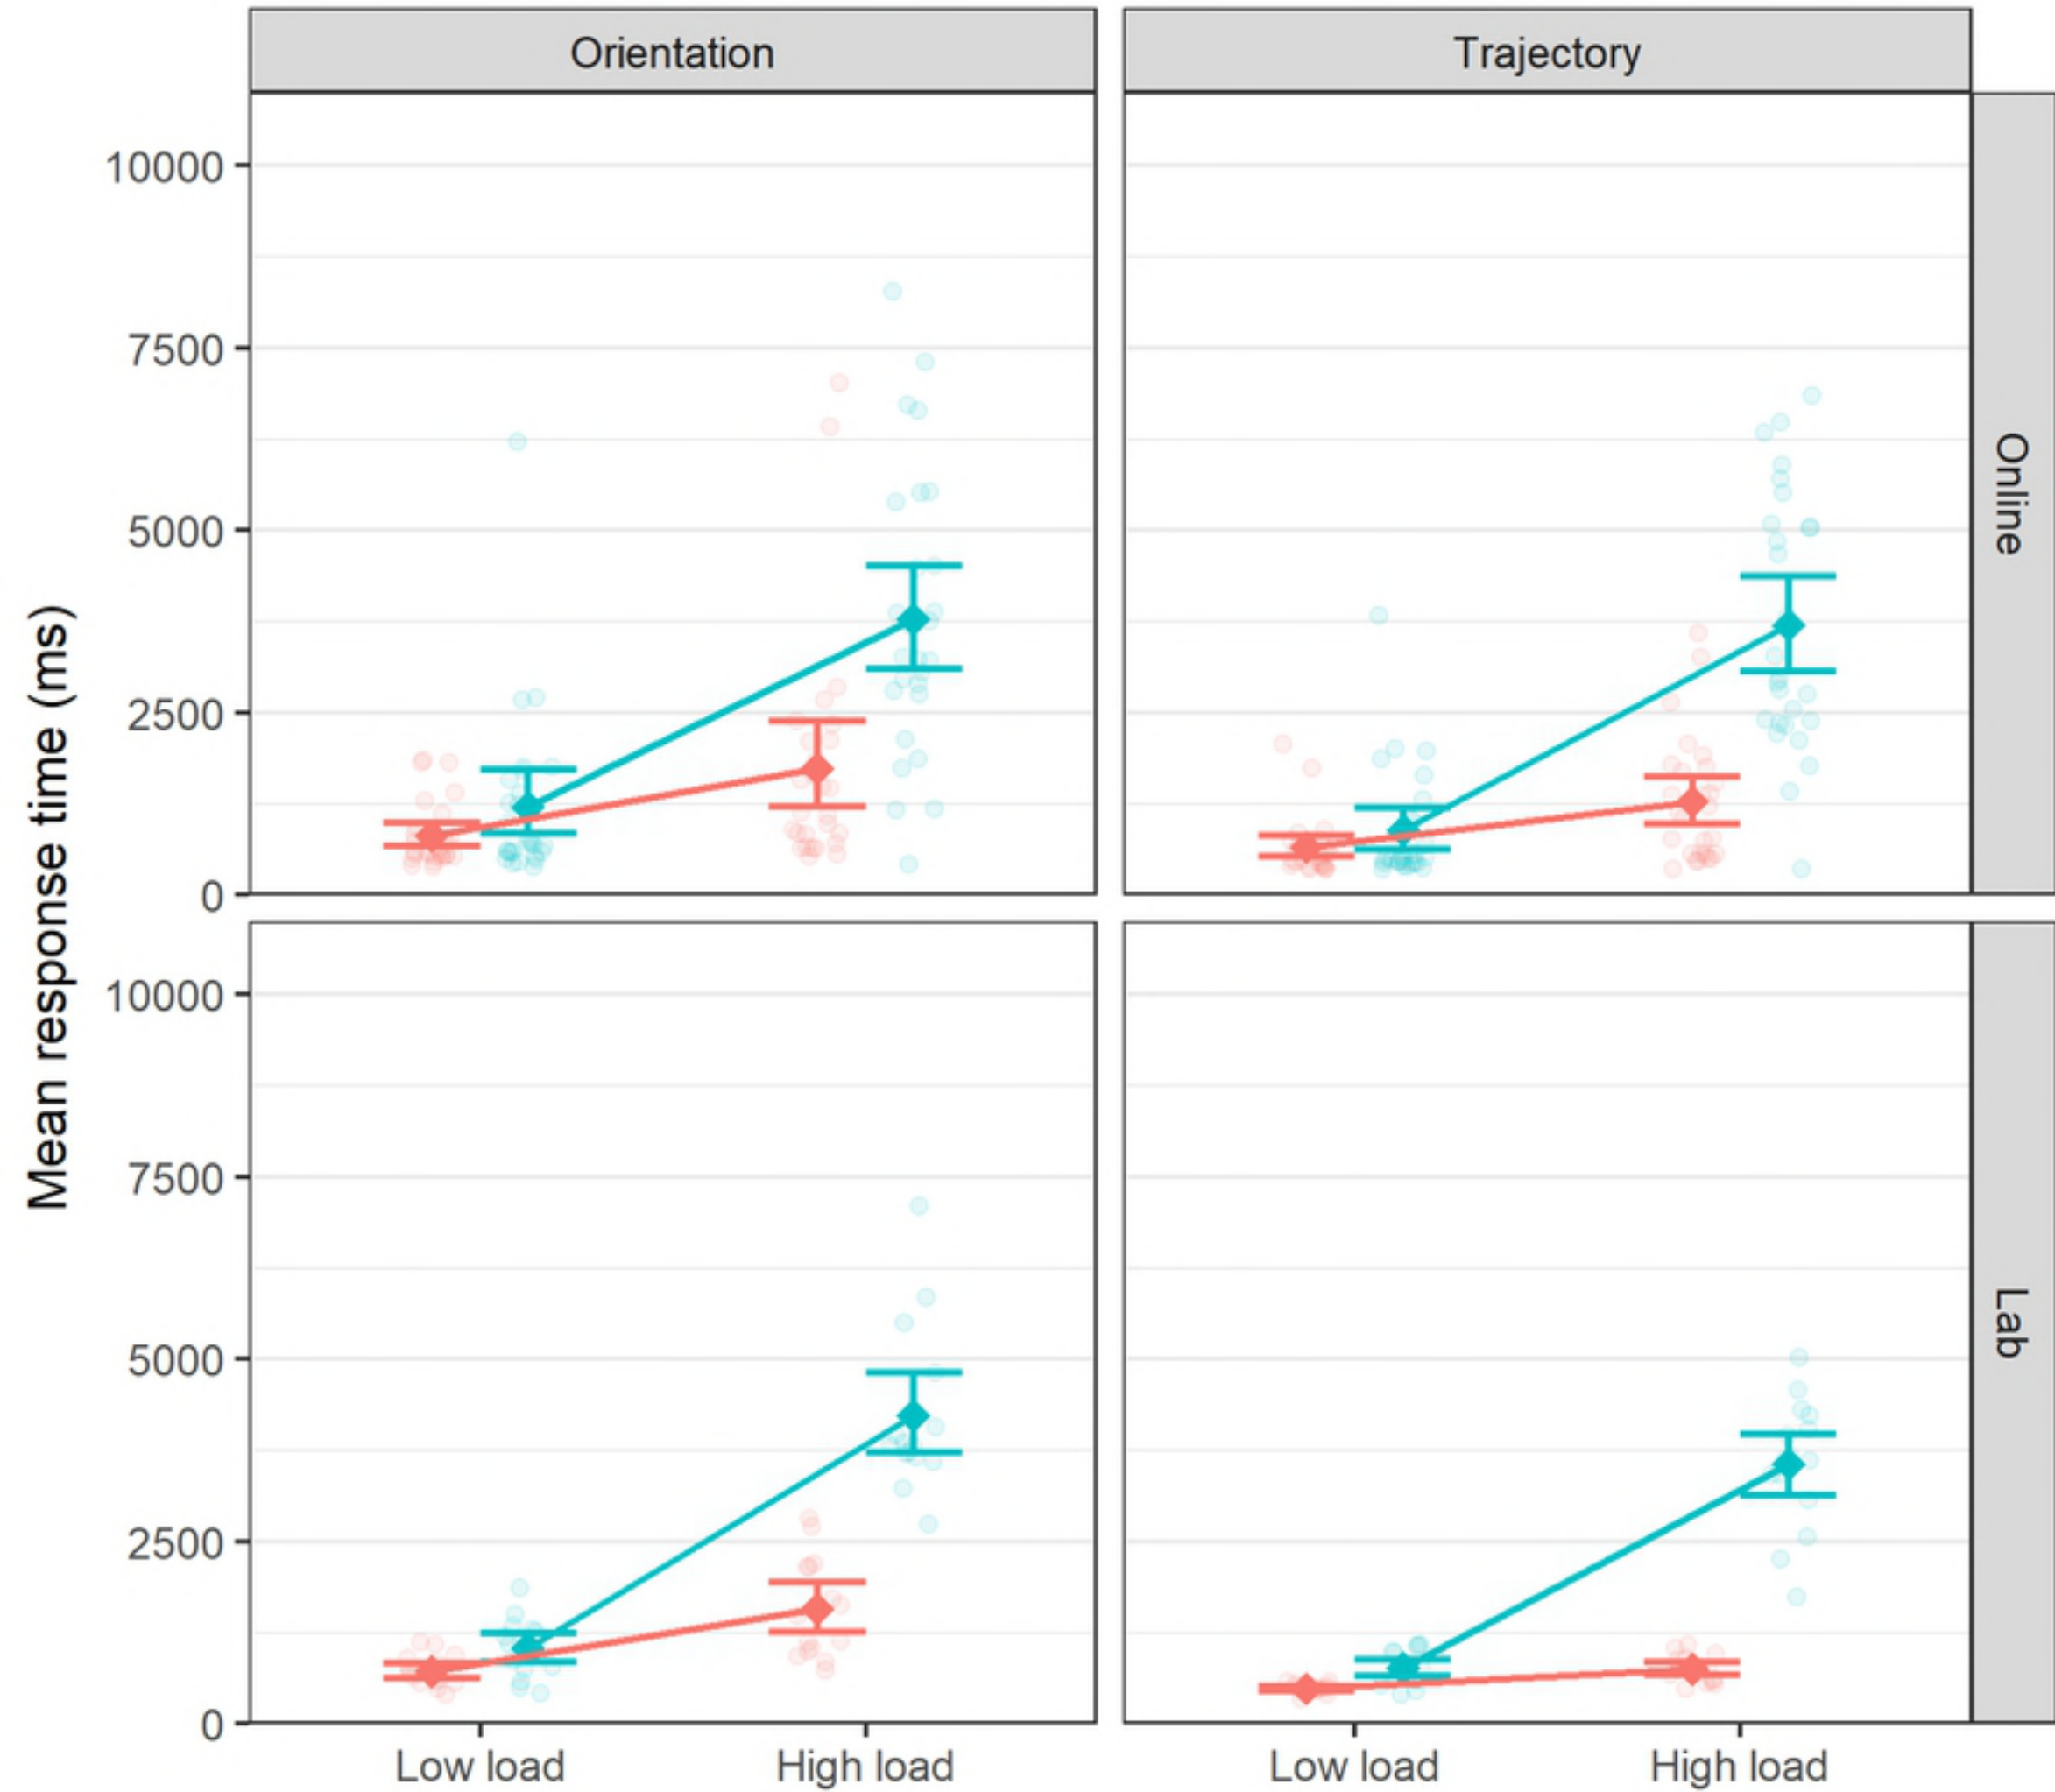

Source: https://www.biorxiv.org/content/10.1101/391359v1.full.pdf
